1 **Estimating effects of serum vitamin B12 levels on psychiatric disorders and cognitive**  
2 **impairment: a Mendelian randomization study**

3 Tianyuan Lu<sup>1,\*</sup> and Andrew D. Paterson<sup>2,3,4,\*</sup>

4  
5 <sup>1</sup>Department of Statistical Sciences, Faculty of Arts and Science, University of Toronto, Toronto,  
6 ON, Canada

7 <sup>2</sup>Division of Biostatistics, Dalla Lana School of Public Health, University of Toronto, Toronto, ON,  
8 Canada

9 <sup>3</sup>Division of Epidemiology, Dalla Lana School of Public Health, University of Toronto, Toronto, ON,  
10 Canada

11 <sup>4</sup>Genetics and Genome Biology, The Hospital for Sick Children, Toronto, ON, Canada

12  
13 \*Correspondence to:

14 Tianyuan Lu ([tianyuan.lu@mail.mcgill.ca](mailto:tianyuan.lu@mail.mcgill.ca)) and Andrew D. Paterson  
15 ([andrew.paterson@sickkids.ca](mailto:andrew.paterson@sickkids.ca))

16 Address: Program in Genetics & Genomic Biology, The Hospital for Sick Children Research  
17 Institute, PGCRL Rm 12.9835, 686 Bay Street, Toronto, ON M5G 0A4, Canada

18

19 **Abstract (For Translational Psychiatry: unstructured; 300 words)**

20 Vitamin B12 deficiency can lead to pernicious anemia, various neuropsychiatric diseases, and  
21 cognitive decline. However, it is unclear whether increasing vitamin B12 levels can help to  
22 prevent the onset of psychiatric disorders and cognitive impairment in the general population.  
23 Leveraging large-scale genome-wide association studies (GWASs), we conducted Mendelian  
24 randomization (MR) analyses to estimate the potential effects of serum vitamin B12 levels on  
25 eight psychiatric disorders, as well as educational attainment and cognitive performance. We  
26 performed sensitivity analyses by excluding genetic instruments that demonstrated potential  
27 horizontal pleiotropy. We conducted additional MR analyses utilizing within-sibship studies for  
28 depressive symptoms, educational attainment, and cognitive performance to mitigate bias due  
29 to potential residual confounding in GWASs. As a positive control, we confirmed that a one  
30 standard deviation increase in genetically increased vitamin B12 levels was strongly associated  
31 with a decreased odds of developing pernicious anemia (odds ratio, OR = 0.24; 95% confidence  
32 interval, CI: 0.15-0.40; p-value =  $2.1 \times 10^{-8}$ ). In contrast, MR estimates of vitamin B12 effects on all  
33 eight psychiatric disorders, educational attainment and cognitive performance largely  
34 overlapped with the null. In particular, based on the three most well-powered GWASs, a one  
35 standard deviation increase in genetically predicted vitamin B12 levels was associated with an  
36 OR of 1.01 for depression (95% CI: 0.97-1.04; p-value = 0.74), a  $7.7 \times 10^{-3}$  standard deviation  
37 increase in educational attainment (95% CI:  $-1.0 \times 10^{-2}$ - $2.5 \times 10^{-2}$ ; p-value = 0.39) and a  $1.3 \times 10^{-2}$   
38 standard deviation increase in cognitive performance (95% CI:  $-8.8 \times 10^{-3}$ - $3.5 \times 10^{-2}$ ; p-value = 0.24).  
39 No significant associations between genetically predicted vitamin B12 levels and any of the  
40 outcomes were identified in sensitivity analyses excluding pleiotropic genetic instruments or MR  
41 analyses based on within-sibship studies. In summary, our findings suggest that increasing serum  
42 vitamin B12 levels may not protect against the investigated psychiatric disorders or cognitive  
43 impairment in the general population.

44

## 45 Introduction

46 Vitamin B12, also known as cobalamin, is an important water-soluble vitamin<sup>1</sup>. Together with  
47 folate, vitamin B12 has multiple essential roles in various biological processes, such as DNA  
48 synthesis and methylation, maturation of erythrocytes, as well as fatty acid and amino acid  
49 metabolism<sup>2-4</sup>. Vitamin B12 also contributes to the maintenance of the nervous system via the  
50 synthesis of myelin and neuronal regeneration<sup>5, 6</sup>. For humans, vitamin B12 is obtained  
51 exclusively from dietary intake<sup>1</sup>.

52  
53 Vitamin B12 deficiency affects a significant proportion of the global population, including both  
54 females and males and across all age groups<sup>7, 8</sup>. Vitamin B12 deficiency defined as serum vitamin  
55 B12 levels < 148 pmol per litre has been estimated to affect 2.9% of the adult population in the  
56 United States<sup>9</sup>. Untreated vitamin B12 deficiency can lead to pernicious anemia and can result in  
57 neurological manifestations, such as peripheral neuropathy, ataxia, various psychiatric disorders,  
58 as well as cognitive impairment<sup>7, 8, 10</sup>. Amongst individuals with depression or schizophrenia,  
59 randomized placebo-controlled trials have shown that folate plus vitamin B12 supplementation  
60 may preserve cognitive functions and delay the disease progression<sup>11-13</sup>. However, randomized  
61 placebo-controlled trials have not elucidated whether increasing vitamin B12 levels through  
62 supplementation can help to prevent the onset of psychiatric disorders and cognitive impairment  
63 in the general population<sup>14</sup>, where the majority does not have clinical vitamin B12 deficiency.  
64 Although a longitudinal study indicated that vitamin B12 levels are negatively associated with  
65 incident depressive symptoms in older adults<sup>15</sup>, these observational associations may be subject  
66 to confounding factors that are difficult to fully account for, such as socioeconomic status,  
67 lifestyle factors, and comorbidities.

68  
69 Mendelian randomization (MR) provides an effective and inexpensive alternative for estimating  
70 potential effects of vitamin B12 levels in the general population. MR employs genetic variants as  
71 instruments for an exposure (i.e. vitamin B12 levels) and assesses the associations between the  
72 genetically predicted exposure and the outcomes under investigation<sup>16, 17</sup>. MR relies on three  
73 instrumental variable assumptions: (1) the genetic instruments should be associated with the  
74 exposure; (2) the genetic instruments should not be associated with any confounders; and (3)  
75 the genetic instruments should affect the outcome through the exposure and not through other  
76 mechanisms, which is known as the assumption of no horizontal pleiotropy. Given that genetic  
77 variants are typically randomized at conception, the first two MR assumptions are likely fulfilled  
78 by selecting variants significantly associated with serum B12 levels as genetic instruments from  
79 recent large-scale genome-wide association studies (GWASs)<sup>18</sup>, although the assumption of no  
80 horizontal pleiotropy requires further verification.

81  
82 MR has been adopted to evaluate the relationships between serum vitamin B12 levels and  
83 several diseases and biomarkers. Suggestive evidence has indicated that increased vitamin B12  
84 levels may marginally increase fasting glucose while reducing beta-cell function in the pancreas<sup>19</sup>.  
85 However, no explicit associations have been identified between vitamin B12 levels and coronary  
86 artery disease, type 2 diabetes, measures of obesity, or Alzheimer's disease<sup>19, 20</sup>. Recently, a  
87 phenome-wide study based on the UK Biobank confirmed the association between increased  
88 vitamin B12 levels and reduced odds of pernicious anemia<sup>21</sup>. However, it remains unclear

89 whether the genetically predicted vitamin B12 levels are associated with psychiatric disorders  
90 and cognitive impairment, due to limited statistical power in previous studies.

91

92 Therefore, in this study, we performed MR analyses to investigate the potential effects of serum  
93 vitamin B12 levels on eight common psychiatric disorders and cognitive impairment in the  
94 general population. To maximize statistical power, we utilized the GWASs with the largest sample  
95 sizes to date, encompassing attention-deficit/hyperactivity disorder (ADHD), anorexia nervosa,  
96 anxiety disorders, autism spectrum disorder, bipolar disorder, depression, obsessive-compulsive  
97 disorder (OCD), schizophrenia, as well as educational attainment and cognitive performance.  
98 Multiple sensitivity analyses were performed to address potential bias arising from violations of  
99 instrumental variable assumptions and residual confounding in GWASs. This study aims to  
100 contribute to the understanding of whether vitamin B12 supplementation could serve as a  
101 preventive measure against psychiatric disorders and cognitive impairment in the general  
102 population.

103

## 104 **Methods**

### 105 **Genome-wide association studies of serum vitamin B12 and folate levels**

106 Serum vitamin B12 levels were measured in three cohort studies<sup>18</sup>. GWAS meta-analyses were  
107 performed based on a total of 45,576 participants of European ancestry, including 37,283  
108 individuals from an Icelandic cohort and 8,293 individuals from two Danish cohorts. Furthermore,  
109 GWAS meta-analyses for serum folate levels were performed in the same cohort studies, based  
110 on a total of 37,341 individuals. Vitamin B12 and folate levels were quantile normalized prior to  
111 analysis. Details of these GWAS meta-analyses have been described previously<sup>18</sup>. Independent  
112 genetic variants significantly associated with serum vitamin B12 and folate levels with a p-value  
113  $< 2.2 \times 10^{-9}$  (Bonferroni-corrected genome-wide significance threshold accounting for 22.9 million  
114 tested variants) were utilized as genetic instruments. We calculated the F-statistic of each genetic  
115 instrument, where an F-statistic  $> 10$  would indicate a low risk of weak instrument bias<sup>22</sup>. The  
116 genetic instruments and the mapped protein-coding genes are summarized in **Supplementary**  
117 **Table S1**.

118

### 119 **Known genotype-phenotype associations involving genetic instruments**

120 To assess the potential risk of horizontal pleiotropy, we evaluated whether the selected genetic  
121 instruments have been associated with other phenotypes. We queried each genetic instrument  
122 in the Open Targets Genetics database<sup>23, 24</sup> (<https://genetics.opentargets.org/>, accessed  
123 December 15, 2023), which includes existing GWASs in the GWAS Catalog as well as GWASs  
124 conducted using the UK Biobank or FinnGen resources<sup>25-28</sup>. After excluding associations with  
125 vitamin B12 levels, folate levels, and pernicious anemia, we considered genetic instruments that  
126 are associated with one to five other phenotypes ( $p$ -value  $< 5.0 \times 10^{-8}$ ) to be subject to a moderate  
127 risk of horizontal pleiotropy, and those associated with more than five other phenotypes to be  
128 subject to a high risk of horizontal pleiotropy. The following analyses focused on vitamin B12  
129 levels because both of the two genetic instruments for folate levels demonstrated potential  
130 horizontal pleiotropy. All genotype-phenotype associations involving genetic instruments are  
131 summarized in **Supplementary Table S2**.

132

### 133 **Association between vitamin B12 levels and pernicious anemia**

134 As a positive control, we assessed whether genetically predicted vitamin B12 and folate levels  
135 were associated with pernicious anemia. We obtained UK Biobank exome-based association  
136 statistics from the Genebase database<sup>29</sup> (<https://app.genebase.org/>, accessed October 19, 2023)  
137 for all genetic instruments were available in the exome-sequencing data. Details regarding quality  
138 control, exome-side association studies, and data curation have been described previously<sup>29</sup>. We  
139 queried each genetic instrument for its associations with various types of anemia, based on  
140 International Classification of Diseases version 10 (ICD-10) codes or self-reported physician-made  
141 diagnoses.

142

143 We performed MR to assess the association between the genetically predicted vitamin B12 levels  
144 and each type of anemia using the weighted median method. This method can tolerate the  
145 inclusion of invalid genetic instruments and can provide consistent estimates with up to 50% of  
146 the information coming from invalid genetic instruments<sup>30</sup>. We additionally performed MR using  
147 the inverse variance weighted regression, penalized weighted median, simple mode, weighted

148 mode, and MR-Egger method, respectively. A nominally significant MR-Egger intercept (p-value  
149 < 0.05) was considered evidence of directional pleiotropy<sup>31</sup>. We derived Wald ratio estimates to  
150 assess the association between the genetically predicted folate levels and each type of anemia,  
151 since only one genetic instrument for folate levels was available in the UK Biobank exome-  
152 sequencing data. MR analyses were conducted using the TwoSampleMR R package version  
153 0.5.6<sup>32</sup>.

### 154 155 **Genome-wide association studies of psychiatric disorders, educational attainment, and** 156 **cognitive performance**

157 The summary statistics of the most recent large-scale GWAS meta-analyses for eight psychiatric  
158 disorders were obtained from the Psychiatric Genomics Consortium, including ADHD<sup>33</sup> (N cases  
159 = 20,183, N controls = 35,191), anorexia nervosa<sup>34</sup> (N cases = 16,992, N controls = 55,525), anxiety  
160 disorders<sup>35</sup> (N cases = 7,016, N controls = 14,745), autism spectrum disorder<sup>36</sup> (N cases = 18,381,  
161 N controls = 27,969), bipolar disorder<sup>37</sup> (N cases = 41,917, N controls = 371,549), depression<sup>38</sup> (N  
162 cases = 246,363, N controls = 561,190), OCD<sup>39</sup> (N cases = 2,688, N controls = 7,037), and  
163 schizophrenia<sup>40</sup> (N cases = 69,369, N controls = 236,642). The GWAS summary statistics for  
164 educational attainment<sup>41</sup> (N = 765,283), measured as number of years of schooling completed,  
165 were obtained from the Social Science Genetic Association Consortium. The GWAS summary  
166 statistics for cognitive performance<sup>42</sup> (N = 257,828), quantified based on various cognitive tests,  
167 were obtained from the Cognitive Genomics Consortium. Participants of these study cohorts  
168 were predominantly of European ancestry. Details of these GWASs are summarized in **Table 1**.

### 169 170 **Power calculation for Mendelian randomization**

171 To assess the likelihood of type II errors, we conducted power calculations for MR analyses using  
172 the mRnd R package<sup>43</sup> (<https://shiny.cnsgenomics.com/mRnd/>, accessed December 15, 2023).  
173 The type I error rate was set at 5%. For each psychiatric disorder, the statistical power was  
174 derived by assuming a true odds ratio (OR) per one standard deviation change in vitamin B12  
175 levels of 1.01, 1.02, 1.03, 1.04, 1.05, 1.10, or 1.20, respectively. For educational attainment and  
176 cognitive performance, the statistical power was derived by assuming a true association with a  
177 magnitude of 0.01, 0.02, 0.03, 0.04, 0.05, 0.10, or 0.20 per one standard deviation change in  
178 vitamin B12 levels, respectively.

### 179 180 **Associations between vitamin B12 levels and psychiatric disorders, educational attainment,** 181 **and cognitive performance**

182 Similar to positive control analyses, we performed MR to assess the association between the  
183 genetically predicted vitamin B12 levels and each of the outcomes. MR estimates derived using  
184 the weighted median method were reported as primary results. Associations with a p-value <  
185  $5.0 \times 10^{-3}$  (Bonferroni-corrected significance threshold accounting for 10 outcomes) were  
186 considered significant. Secondary analyses were performed using the inverse variance weighted  
187 regression, penalized weighted median, simple mode, weighted mode, and MR-Egger method,  
188 respectively. For folate levels, since two genetic instruments were used, the inverse variance  
189 weighted regression estimates were derived to assess the association with each outcome.

### 190 191 **Sensitivity analyses excluding pleiotropic genetic instruments**

192 To mitigate potential bias from horizontal pleiotropy, we excluded genetic instruments that were  
193 subject to a high risk of horizontal pleiotropy and repeated the MR analyses for vitamin B12 levels.  
194 Subsequently, we further excluded genetic instruments that were subject to a moderate risk of  
195 horizontal pleiotropy and again repeated the MR analyses for vitamin B12 levels.

196

#### 197 **Within-sibship genome-wide association studies**

198 Since population GWAS estimates for psychiatric disorders, educational attainment, and  
199 cognitive performance may be confounded by uncontrolled demographic and indirect genetic  
200 effects, we repeated the MR analyses leveraging within-sibship GWAS estimates that were  
201 available for depressive symptoms, educational attainment, and cognitive performance<sup>44</sup>.  
202 Notably, unlike in the GWAS for depression, depressive symptoms were measured using various  
203 rating scales and standardized to be a continuous outcome<sup>44</sup>. European ancestry-specific within-  
204 sibship GWAS summary statistics were obtained from the Within Family Consortium<sup>44</sup>. Details of  
205 these GWASs have been described previously and are summarized in **Supplementary Table S3**.

206

## 207 **Results**

### 208 **Mendelian randomization confirmed association between vitamin B12 levels and pernicious** 209 **anemia**

210 An overview of this study is illustrated in **Figure 1**. Meta-analyses of GWASs for serum vitamin  
211 B12 levels identified 11 genetic instruments ( $p$ -value  $< 2.2 \times 10^{-9}$ ; **Supplementary Table S1**).  
212 Interestingly, all of these 11 variants are missense or stop-gain variants of protein-coding genes  
213 (**Supplementary Table S1**). Of these genetic instruments, the minimal F-statistic was 43.14,  
214 suggesting a low risk of weak instrument bias (**Supplementary Table S1**). Notably, some of these  
215 genetic instruments may pose a risk of horizontal pleiotropy. For instance, rs602662, a missense  
216 variant of *FUT2*, was subject to a high risk of horizontal pleiotropy (**Supplementary Table S2**).  
217 Missense variants in *MUT*, *FUT6*, *CD320*, and *CUBN* were subject to a moderate risk of horizontal  
218 pleiotropy due to their associations with other phenotypes, such as liver function biomarkers,  
219 lipid levels, and height (**Supplementary Table S2**).

220  
221 Based on the UK Biobank, we confirmed that a one standard deviation increase in genetically  
222 predicted vitamin B12 levels was strongly associated with an OR of 0.27 for vitamin B12  
223 deficiency anemia based on ICD-10 codes (95% CI: 0.19-0.40;  $p$ -value =  $1.0 \times 10^{-11}$ ), as well as an  
224 OR of 0.24 for self-reported pernicious anemia (95% CI: 0.15-0.40;  $p$ -value =  $2.1 \times 10^{-8}$ ; **Figure 2**  
225 and **Supplementary Table S4**). Meanwhile, the genetically predicted vitamin B12 levels were not  
226 associated with other types of anemia (**Figure 2** and **Supplementary Table S4**). MR estimates  
227 derived using different methods were highly consistent (**Supplementary Table S4**).

228  
229 In addition, two independent genetic variants, rs1801133 and rs652197, were significantly  
230 associated with serum folate levels ( $p$ -value  $< 2.2 \times 10^{-9}$ ; **Supplementary Table S1**). However,  
231 rs1801133, a missense variant of *MTHFR*, demonstrated a high risk of horizontal pleiotropy, while  
232 rs652197, an intronic variant of *FOLR3*, has been associated with serum 25-hydroxyvitamin D  
233 levels in previous studies (**Supplementary Table S2**). As expected, the genetically predicted folate  
234 levels were also associated with a reduced odds of vitamin B12 deficiency anemia based on ICD-  
235 10 codes (OR = 0.30; 95% CI: 0.18-0.49;  $p$ -value =  $2.3 \times 10^{-6}$ ) and self-reported pernicious anemia  
236 (OR = 0.29; 95% CI: 0.14-0.60;  $p$ -value =  $9.3 \times 10^{-4}$ ; **Figure 2** and **Supplementary Table S4**).  
237 Although folate levels were predicted to reduce the odds of folate deficiency anemia, this  
238 association was not significant, likely due to the small number of folate deficiency anemia cases  
239 (**Figure 2** and **Supplementary Table S4**).

### 240 241 **Genetically predicted vitamin B12 levels were not associated with psychiatric disorders,** 242 **educational attainment, and cognitive performance**

243 The large-scale GWASs for psychiatric disorders, educational attainment, and cognitive  
244 performance ensured sufficient statistical power in MR analyses (**Table 1** and **Supplementary**  
245 **Table S5**). Of the eight psychiatric disorders under investigation, the GWAS meta-analyses for  
246 depression had the largest sample size. As a result, with a type I error rate of 5%, MR analyses  
247 with depression as the outcome could achieve a power  $\geq 80\%$  when the true OR per one standard  
248 deviation change in vitamin B12 levels was equal to or greater than 1.03 (**Supplementary Table**  
249 **S5**). Comparably, MR analyses for educational attainment and cognitive performance could



250 achieve a power of 100% and 94%, respectively, when the true association had a magnitude of  
251 0.03 per one standard deviation change in vitamin B12 levels (**Supplementary Table S5**).

252  
253 Despite sufficient statistical power, MR analyses did not detect any significant associations  
254 between genetically predicted vitamin B12 levels and any outcomes (**Figure 3** and  
255 **Supplementary Table S5**). For example, a one standard deviation increase in genetically  
256 predicted vitamin B12 levels was associated with an OR of 1.01 for depression (95% CI: 0.97-1.04;  
257 p-value = 0.74), as well as a  $7.7 \times 10^{-3}$  and  $1.3 \times 10^{-2}$  standard deviation increase in educational  
258 attainment (95% CI:  $-1.0 \times 10^{-2}$ - $2.5 \times 10^{-2}$ ; p-value = 0.39) and cognitive performance (95% CI: -  
259  $8.8 \times 10^{-3}$ - $3.5 \times 10^{-2}$ ; p-value = 0.24), respectively (**Figure 3** and **Supplementary Table S5**). The  
260 estimated associations between folate levels and the outcomes also largely overlapped with the  
261 null (**Figure 3** and **Supplementary Table S6**).

262  
263 Furthermore, no associations were detected between genetically predicted vitamin B12 levels  
264 and any outcomes in sensitivity analyses where the genetic instruments demonstrating potential  
265 horizontal pleiotropy were excluded (**Figure 3** and **Supplementary Tables S7** and **S8**). In fact,  
266 none of the tested associations had a nominal p-value < 0.05 in the primary analyses using the  
267 weighted median method (**Figure 3**). The estimates derived using alternative methods were  
268 highly consistent with the primary results, with the only exception that with the penalized  
269 weighted median method, a one standard deviation increase in genetically predicted vitamin B12  
270 levels was associated with an OR of 0.82 for ADHD (95% CI: 0.72-0.93; p-value =  $2.1 \times 10^{-3}$ ;  
271 **Supplementary Figure S1** and **Supplementary Table S5**). Nevertheless, this association was not  
272 detected after excluding the highly pleiotropic genetic instrument in *FUT2* (**Supplementary Table**  
273 **S7**) as well as after further excluding the moderately pleiotropic genetic instruments  
274 (**Supplementary Table S8**).

275  
276 **Sensitivity analyses based on within-sibship genome-wide association studies**  
277 MR analyses leveraging within-sibship GWASs for depressive symptoms, educational attainment,  
278 and cognitive performance did not identify any significant associations with genetically predicted  
279 vitamin B12 levels (**Figure 4A**). Specifically, a one standard deviation increase in genetically  
280 predicted vitamin B12 levels was associated with a  $5.4 \times 10^{-2}$  standard deviation decrease in  
281 depressive symptoms (95% CI:  $-0.14$ - $3.6 \times 10^{-2}$ ; p-value = 0.24), as well as a  $5.6 \times 10^{-3}$  and  $3.9 \times 10^{-2}$   
282 standard deviation increase in educational attainment (95% CI:  $-4.3 \times 10^{-2}$ - $5.5 \times 10^{-2}$ ; p-value = 0.82)  
283 and cognitive performance (95% CI:  $-6.6 \times 10^{-2}$ -0.14; p-value = 0.47), respectively (**Figure 4A** and  
284 **Supplementary Table S9**). These estimates were consistent with those obtained using alternative  
285 MR methods (**Figure 4B-D** and **Supplementary Table S9**).

286

## 287 Discussion

288 Vitamin B12 has important roles in one-carbon metabolism as both an enzyme cofactor or  
289 substrate<sup>1</sup>. Individuals with vitamin B12 deficiency can develop pernicious anemia as well as  
290 neuropsychiatric diseases<sup>7, 8</sup>. However, it remains unclear whether the general population may  
291 benefit from vitamin B12 supplementation for protection against psychiatric disorders and  
292 cognitive impairment. In this study, we performed MR analyses to estimate the potential effects  
293 of serum vitamin B12 levels on eight psychiatric disorders, educational attainment, and cognitive  
294 performance. We did not detect any significant associations between genetically predicted  
295 serum vitamin B12 levels and any of these outcomes.

296  
297 Our study has several strengths. First, we employed genetic instruments that were protein-  
298 altering variants affecting crucial genes in the absorption, transport, or enzymatic reactions of  
299 vitamin B12 for MR analyses<sup>18</sup>. This approach effectively mitigated bias arising from unmeasured  
300 confounding and reverse causation. Second, the use of large-scale GWASs for the outcomes,  
301 particularly depression, educational attainment, and cognitive performance, minimized the  
302 likelihood of type II errors, given the reporting of null associations. These results were compared  
303 to the positive control, where genetically increased vitamin B12 levels exhibited strong protective  
304 effects against pernicious anemia, thereby supporting the validity of our analyses. Third,  
305 consistent MR estimates were obtained in sensitivity analyses where pleiotropic variants were  
306 removed, safeguarding an indispensable instrumental variable assumption of MR. Nevertheless,  
307 MR estimates for folate levels were more prone to bias due to horizontal pleiotropy, thus  
308 interpreting the results involving folate levels requires extra caution. Fourth, MR analyses based  
309 on within-sibship GWASs for depressive symptoms, educational attainment, and cognitive  
310 performance further reduced the risk of confounding due to uncontrolled population  
311 stratification, assortative mating, or indirect genetic effects<sup>44</sup>.

312  
313 Our study has a clear and important implication that, in the general population, vitamin B12  
314 supplementation is unlikely to meaningfully reduce the risks of the investigated psychiatric  
315 disorders or significantly improve educational attainment or cognitive performance. These  
316 results may discourage randomized placebo-controlled trials amongst individuals without clinical  
317 vitamin B12 deficiency, while encouraging the identification of other risk factors and preventive  
318 measures for psychiatric disorders and cognitive impairment. However, it is noteworthy that  
319 none of the GWASs utilized in this study were based on populations selected for vitamin B12  
320 deficiency. Multiple lines of evidence are still needed to ascertain the potential impact of vitamin  
321 B12 or folate plus vitamin B12 supplementation on various outcomes in individuals with vitamin  
322 B12 deficiency.

323  
324 Some limitations of our study should be noted. First, our MR analyses relied on sex-combined  
325 GWASs and could not identify potential sex-specific effects of vitamin B12 levels, since large-scale  
326 sex-stratified GWASs for both vitamin B12 levels and the outcomes are yet to emerge. Second,  
327 our analyses were restricted to populations of European ancestry. It remains unclear whether  
328 our findings could be generalized to other populations of non-European ancestries. Third, larger  
329 GWASs for certain psychiatric disorders, such as OCD and anxiety disorders, are necessary to  
330 increase the statistical power of MR analyses for identifying potential effects of small magnitudes.

331 Fourth, our MR analyses could estimate population-averaged associations between vitamin B12  
332 levels and the outcomes, but not potential dose-dependent effects of vitamin B12 levels, which  
333 would require availability of both vitamin B12 measurements and the outcomes in the same  
334 study population<sup>45, 46</sup>. Fifth, one of the genetic instruments, rs371753672, a missense variant of  
335 *MMACHC*, was not available in any GWASs utilized in this study due to its low minor allele  
336 frequency. However, this variant only captures a small proportion of variance in vitamin B12  
337 levels. Last, our results do not provide information on whether serum vitamin B12 levels may  
338 influence the progression of psychiatric disorders or cognitive impairment, as the genetic  
339 architecture underlying disease progression may differ from that underlying disease  
340 pathogenesis. We anticipate that future investigations will more comprehensively illuminate the  
341 role of vitamin B12 in various psychiatric disorders and cognitive impairment in diverse  
342 populations.

343  
344 In conclusion, through MR analyses, we demonstrated that genetically predicted serum vitamin  
345 B12 levels were not associated with eight psychiatric disorders, educational attainment, or  
346 cognitive performance. Our findings indicate that vitamin B12 supplementation is unlikely to  
347 offer protection against these psychiatric disorders or cognitive impairment in the general  
348 population.

349

350 ***Author contributions***

351 T.L. and A.D.P. conceptualized the study. T.L. curated the data, performed the analyses, and  
352 wrote the original draft. T.L. and A.D.P. interpreted the results, and reviewed and edited the  
353 manuscript critically.

354

355 ***Acknowledgements***

356 We thank David S. Rosenblatt and David Watkins for helpful discussions. T.L. has been supported  
357 by a Schmidt AI in Science Postdoctoral Fellowship. The funders have no role in study design;  
358 collection, management, analysis and interpretation of data; or the decision to submit for  
359 publication.

360

361 ***Conflicts of interest***

362 T.L. has been providing consulting services to 5 Prime Sciences Inc., which was not involved in  
363 the design, execution, analysis, or interpretation of the study. The other authors declare no  
364 conflicts of interest.

365

## 366 References

- 367 1. Zempleni J, Suttie JW, Gregory III JF, Stover PJ. *Handbook of vitamins*. CRC Press; 2013.
- 368 2. Bohnsack BL, Hirschi KK. Nutrient regulation of cell cycle progression. *Annu Rev Nutr*.  
369 2004;24:433-53. doi:10.1146/annurev.nutr.23.011702.073203
- 370 3. O'Leary F, Samman S. Vitamin B12 in health and disease. *Nutrients*. Mar 2010;2(3):299-  
371 316. doi:10.3390/nu2030299
- 372 4. Stover PJ. Physiology of folate and vitamin B12 in health and disease. *Nutr Rev*. Jun  
373 2004;62(6 Pt 2):S3-12; discussion S13. doi:10.1111/j.1753-4887.2004.tb00070.x
- 374 5. Calderon-Ospina CA, Nava-Mesa MO. B Vitamins in the nervous system: Current  
375 knowledge of the biochemical modes of action and synergies of thiamine, pyridoxine, and  
376 cobalamin. *CNS Neurosci Ther*. Jan 2020;26(1):5-13. doi:10.1111/cns.13207
- 377 6. Briani C, Dalla Torre C, Citton V, et al. Cobalamin deficiency: clinical picture and  
378 radiological findings. *Nutrients*. Nov 15 2013;5(11):4521-39. doi:10.3390/nu5114521
- 379 7. Green R, Allen LH, Bjørke-Monsen A-L, et al. Vitamin B12 deficiency. *Nature reviews*  
380 *Disease primers*. 2017;3(1):1-20.
- 381 8. Stabler SP. Vitamin B12 deficiency. *New England Journal of Medicine*. 2013;368(2):149-  
382 160.
- 383 9. Bailey RL, Carmel R, Green R, et al. Monitoring of vitamin B-12 nutritional status in the  
384 United States by using plasma methylmalonic acid and serum vitamin B-12. *Am J Clin Nutr*. Aug  
385 2011;94(2):552-61. doi:10.3945/ajcn.111.015222
- 386 10. Lindenbaum J, Healton EB, Savage DG, et al. Neuropsychiatric disorders caused by  
387 cobalamin deficiency in the absence of anemia or macrocytosis. *N Engl J Med*. Jun 30  
388 1988;318(26):1720-8. doi:10.1056/NEJM198806303182604
- 389 11. Roffman JL, Lamberti JS, Achtyes E, et al. Randomized multicenter investigation of folate  
390 plus vitamin B12 supplementation in schizophrenia. *JAMA Psychiatry*. May 2013;70(5):481-9.  
391 doi:10.1001/jamapsychiatry.2013.900
- 392 12. Walker JG, Batterham PJ, Mackinnon AJ, et al. Oral folic acid and vitamin B-12  
393 supplementation to prevent cognitive decline in community-dwelling older adults with  
394 depressive symptoms—the Beyond Ageing Project: a randomized controlled trial. *The American*  
395 *journal of clinical nutrition*. 2012;95(1):194-203.
- 396 13. Almeida OP, Ford AH, Flicker L. Systematic review and meta-analysis of randomized  
397 placebo-controlled trials of folate and vitamin B12 for depression. *Int Psychogeriatr*. May  
398 2015;27(5):727-37. doi:10.1017/S1041610215000046
- 399 14. Walker JG, Mackinnon AJ, Batterham P, et al. Mental health literacy, folic acid and vitamin  
400 B12, and physical activity for the prevention of depression in older adults: randomised controlled  
401 trial. *Br J Psychiatry*. Jul 2010;197(1):45-54. doi:10.1192/bjp.bp.109.075291
- 402 15. Laird EJ, O'Halloran AM, Molloy AM, et al. Low vitamin B12 but not folate is associated  
403 with incident depressive symptoms in community-dwelling older adults: a 4-year longitudinal  
404 study. *British Journal of Nutrition*. 2021:1-8.
- 405 16. Skrivankova VW, Richmond RC, Woolf BA, et al. Strengthening the reporting of  
406 observational studies in epidemiology using mendelian randomisation (STROBE-MR): explanation  
407 and elaboration. *bmj*. 2021;375

- 408 17. Skrivankova VW, Richmond RC, Woolf BA, et al. Strengthening the Reporting of  
409 Observational Studies in Epidemiology using Mendelian Randomization: the STROBE-MR  
410 Statement. *JAMA*. 2021;326(16):1614-1621.
- 411 18. Grarup N, Sulem P, Sandholt CH, et al. Genetic architecture of vitamin B12 and folate  
412 levels uncovered applying deeply sequenced large datasets. *PLoS Genet*. Jun 2013;9(6):e1003530.  
413 doi:10.1371/journal.pgen.1003530
- 414 19. Moen GH, Qvigstad E, Birkeland KI, Evans DM, Sommer C. Are serum concentrations of  
415 vitamin B-12 causally related to cardiometabolic risk factors and disease? A Mendelian  
416 randomization study. *Am J Clin Nutr*. Aug 1 2018;108(2):398-404. doi:10.1093/ajcn/nqy101
- 417 20. Gagliano Taliun SA. Genetic determinants of low vitamin B12 levels in Alzheimer's disease  
418 risk. *Alzheimers Dement (Amst)*. Dec 2019;11:430-434. doi:10.1016/j.dadm.2019.04.007
- 419 21. Dib MJ, Ahmadi KR, Zagkos L, et al. Associations of Genetically Predicted Vitamin B(12)  
420 Status across the Phenome. *Nutrients*. Nov 26 2022;14(23)doi:10.3390/nu14235031
- 421 22. Burgess S, Thompson SG, Collaboration CCG. Avoiding bias from weak instruments in  
422 Mendelian randomization studies. *Int J Epidemiol*. Jun 2011;40(3):755-64.  
423 doi:10.1093/ije/dyr036
- 424 23. Ghousaini M, Mountjoy E, Carmona M, et al. Open Targets Genetics: systematic  
425 identification of trait-associated genes using large-scale genetics and functional genomics.  
426 *Nucleic Acids Res*. Jan 8 2021;49(D1):D1311-D1320. doi:10.1093/nar/gkaa840
- 427 24. Ochoa D, Hercules A, Carmona M, et al. Open Targets Platform: supporting systematic  
428 drug-target identification and prioritisation. *Nucleic Acids Res*. Jan 8 2021;49(D1):D1302-D1310.  
429 doi:10.1093/nar/gkaa1027
- 430 25. Bycroft C, Freeman C, Petkova D, et al. The UK Biobank resource with deep phenotyping  
431 and genomic data. *Nature*. Oct 2018;562(7726):203-209. doi:10.1038/s41586-018-0579-z
- 432 26. Kurki MI, Karjalainen J, Palta P, et al. FinnGen provides genetic insights from a well-  
433 phenotyped isolated population. *Nature*. Jan 2023;613(7944):508-518. doi:10.1038/s41586-022-  
434 05473-8
- 435 27. Buniello A, MacArthur JAL, Cerezo M, et al. The NHGRI-EBI GWAS Catalog of published  
436 genome-wide association studies, targeted arrays and summary statistics 2019. *Nucleic Acids Res*.  
437 Jan 8 2019;47(D1):D1005-D1012. doi:10.1093/nar/gky1120
- 438 28. MacArthur J, Bowler E, Cerezo M, et al. The new NHGRI-EBI Catalog of published genome-  
439 wide association studies (GWAS Catalog). *Nucleic Acids Res*. Jan 4 2017;45(D1):D896-D901.  
440 doi:10.1093/nar/gkw1133
- 441 29. Karczewski KJ, Solomonson M, Chao KR, et al. Systematic single-variant and gene-based  
442 association testing of thousands of phenotypes in 394,841 UK Biobank exomes. *Cell Genom*. Sep  
443 14 2022;2(9):100168. doi:10.1016/j.xgen.2022.100168
- 444 30. Bowden J, Davey Smith G, Haycock PC, Burgess S. Consistent estimation in Mendelian  
445 randomization with some invalid instruments using a weighted median estimator. *Genetic  
446 epidemiology*. 2016;40(4):304-314.
- 447 31. Bowden J, Davey Smith G, Burgess S. Mendelian randomization with invalid instruments:  
448 effect estimation and bias detection through Egger regression. *International journal of  
449 epidemiology*. 2015;44(2):512-525.
- 450 32. Hemani G, Zheng J, Elsworth B, et al. The MR-Base platform supports systematic causal  
451 inference across the human phenome. *Elife*. May 30 2018;7doi:10.7554/eLife.34408

- 452 33. Demontis D, Walters RK, Martin J, et al. Discovery of the first genome-wide significant risk  
453 loci for attention deficit/hyperactivity disorder. *Nat Genet.* Jan 2019;51(1):63-75.  
454 doi:10.1038/s41588-018-0269-7
- 455 34. Watson HJ, Yilmaz Z, Thornton LM, et al. Genome-wide association study identifies eight  
456 risk loci and implicates metabo-psychiatric origins for anorexia nervosa. *Nat Genet.* Aug  
457 2019;51(8):1207-1214. doi:10.1038/s41588-019-0439-2
- 458 35. Otowa T, Hek K, Lee M, et al. Meta-analysis of genome-wide association studies of anxiety  
459 disorders. *Mol Psychiatry.* Oct 2016;21(10):1485. doi:10.1038/mp.2016.11
- 460 36. Grove J, Ripke S, Als TD, et al. Identification of common genetic risk variants for autism  
461 spectrum disorder. *Nat Genet.* Mar 2019;51(3):431-444. doi:10.1038/s41588-019-0344-8
- 462 37. Mullins N, Forstner AJ, O'Connell KS, et al. Genome-wide association study of more than  
463 40,000 bipolar disorder cases provides new insights into the underlying biology. *Nat Genet.* Jun  
464 2021;53(6):817-829. doi:10.1038/s41588-021-00857-4
- 465 38. Howard DM, Adams MJ, Clarke TK, et al. Genome-wide meta-analysis of depression  
466 identifies 102 independent variants and highlights the importance of the prefrontal brain regions.  
467 *Nat Neurosci.* Mar 2019;22(3):343-352. doi:10.1038/s41593-018-0326-7
- 468 39. International Obsessive Compulsive Disorder Foundation Genetics C, Studies ODCGA.  
469 Revealing the complex genetic architecture of obsessive-compulsive disorder using meta-analysis.  
470 *Mol Psychiatry.* May 2018;23(5):1181-1188. doi:10.1038/mp.2017.154
- 471 40. Trubetskoy V, Pardinas AF, Qi T, et al. Mapping genomic loci implicates genes and synaptic  
472 biology in schizophrenia. *Nature.* Apr 2022;604(7906):502-508. doi:10.1038/s41586-022-04434-  
473 5
- 474 41. Okbay A, Wu Y, Wang N, et al. Polygenic prediction of educational attainment within and  
475 between families from genome-wide association analyses in 3 million individuals. *Nature genetics.*  
476 2022;54(4):437-449.
- 477 42. Lee JJ, Wedow R, Okbay A, et al. Gene discovery and polygenic prediction from a genome-  
478 wide association study of educational attainment in 1.1 million individuals. *Nat Genet.* Jul 23  
479 2018;50(8):1112-1121. doi:10.1038/s41588-018-0147-3
- 480 43. Brion MJ, Shakhbazov K, Visscher PM. Calculating statistical power in Mendelian  
481 randomization studies. *Int J Epidemiol.* Oct 2013;42(5):1497-501. doi:10.1093/ije/dyt179
- 482 44. Howe LJ, Nivard MG, Morris TT, et al. Within-sibship genome-wide association analyses  
483 decrease bias in estimates of direct genetic effects. *Nat Genet.* May 2022;54(5):581-592.  
484 doi:10.1038/s41588-022-01062-7
- 485 45. Emerging Risk Factors Collaboration E-CVDVDS. Estimating dose-response relationships  
486 for vitamin D with coronary heart disease, stroke, and all-cause mortality: observational and  
487 Mendelian randomisation analyses. *Lancet Diabetes Endocrinol.* Jan 2024;12(1):e2-e11.  
488 doi:10.1016/S2213-8587(23)00287-5
- 489 46. Lu T, Nakanishi T, Yoshiji S, Butler-Laporte G, Greenwood CMT, Richards JB. Dose-  
490 dependent Association of Alcohol Consumption With Obesity and Type 2 Diabetes: Mendelian  
491 Randomization Analyses. *The Journal of Clinical Endocrinology & Metabolism.*  
492 2023;108(12):3320-3329. doi:10.1210/clinem/dgad324
- 493

Table 1. Genome-wide association studies of psychiatric disorders, educational attainment, and cognitive performance.

| <b>Outcome</b>                                  | <b>Participating cohorts</b>                                                                                                                                                                                | <b>Cases</b> | <b>Controls</b> | <b>Total</b> |
|-------------------------------------------------|-------------------------------------------------------------------------------------------------------------------------------------------------------------------------------------------------------------|--------------|-----------------|--------------|
| <i>Attention-deficit/hyperactivity disorder</i> | A Danish cohort collected by the Lundbeck Foundation Initiative for Integrative Psychiatric Research, and 11 European, North American and Chinese cohorts aggregated by the Psychiatric Genomics Consortium | 20,183       | 35,191          | 55,374       |
| <i>Anorexia nervosa</i>                         | Thirty-three European ancestry cohorts from 17 countries, including the Anorexia Nervosa Genetics Initiative and the Eating Disorders Working Group of the Psychiatric Genomics Consortium                  | 16,992       | 55,525          | 72,517       |
| <i>Anxiety disorders</i>                        | Nine European ancestry cohorts in the Anxiety NeuroGenetics Study Consortium                                                                                                                                | 7,016        | 14,745          | 21,761       |
| <i>Autism spectrum disorder</i>                 | A Danish cohort collected by the Lundbeck Foundation Initiative for Integrative Psychiatric Research                                                                                                        | 18,381       | 27,969          | 46,350       |
| <i>Bipolar disorder</i>                         | Fifty-seven cohorts collected in Europe, North America and Australia                                                                                                                                        | 41,917       | 371,549         | 413,466      |
| <i>Depression</i>                               | Twenty-nine European ancestry cohorts, the UK Biobank, and a discovery subset of 23andMe                                                                                                                    | 246,363      | 561,190         | 807,553      |
| <i>Obsessive-compulsive disorder</i>            | European ancestry individuals from the International Obsessive Compulsive Disorder Foundation Genetics Collaborative and OCD Collaborative Genetics Association Studies                                     | 2,688        | 7,037           | 9,725        |
| <i>Schizophrenia</i>                            | Ninety cohorts including ~80% European ancestry participants and ~20% East Asian ancestry participants                                                                                                      | 69,369       | 236,642         | 306,011      |
| <i>Educational attainment<sup>†</sup></i>       | Sixty-nine European ancestry cohorts in the Social Science Genetic Association Consortium and the UK Biobank European ancestry individuals                                                                  |              |                 | 765,283      |
| <i>Cognitive performance<sup>‡</sup></i>        | Twenty-four European ancestry cohorts in the Cognitive Genomics Consortium and the UK Biobank European ancestry individuals                                                                                 |              |                 | 257,828      |

<sup>†</sup>Educational attainment was measured as number of years of schooling completed

<sup>‡</sup>Cognitive performance was quantified based on various tests conducted in each study cohort



## Data harmonization

### Exposure

Vitamin B12 levels

Folate levels

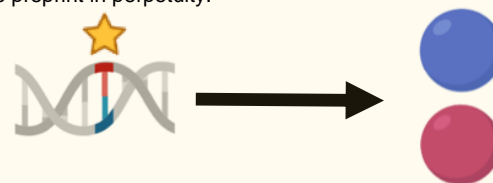

### Outcome

Psychiatric disorders (PGC)

Educational attainment (SSGAC)

Cognitive performance (COGENT)

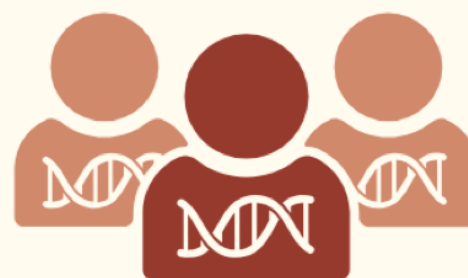

## Mendelian randomization

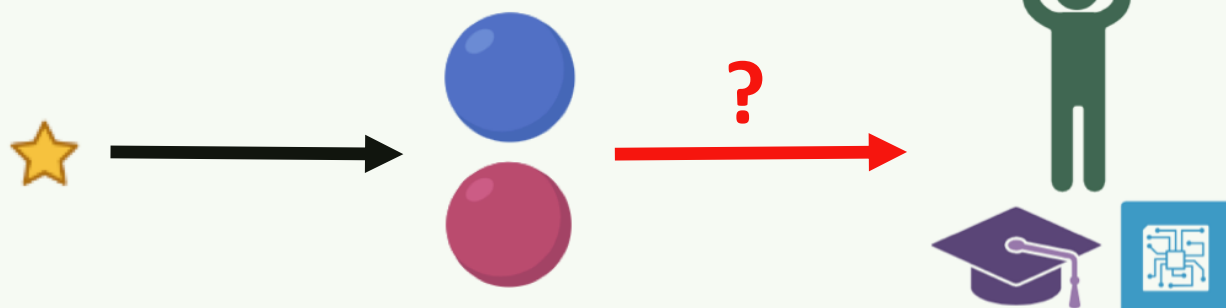

## Sensitivity analyses

Estimates based on non-pleiotropic instruments

Estimates based on within-sibship studies

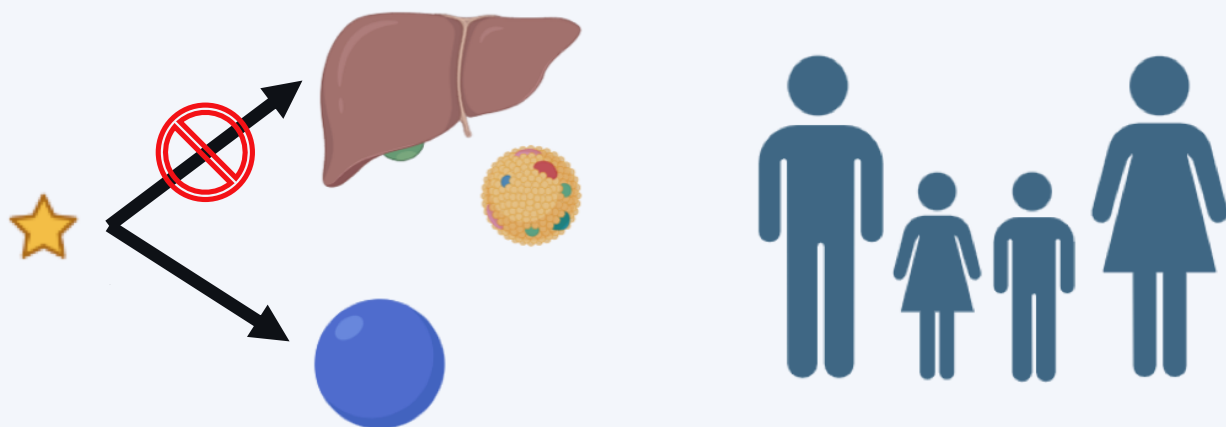

Figure 1. Overview of study design. Summary statistics of large-scale genome-wide association studies were obtained for serum vitamin B12 and folate levels, eight psychiatric disorders, educational attainment, and cognitive performance. Mendelian randomization and multiple sensitivity analyses were performed to estimate the potential effects of vitamin B12 and folate levels.

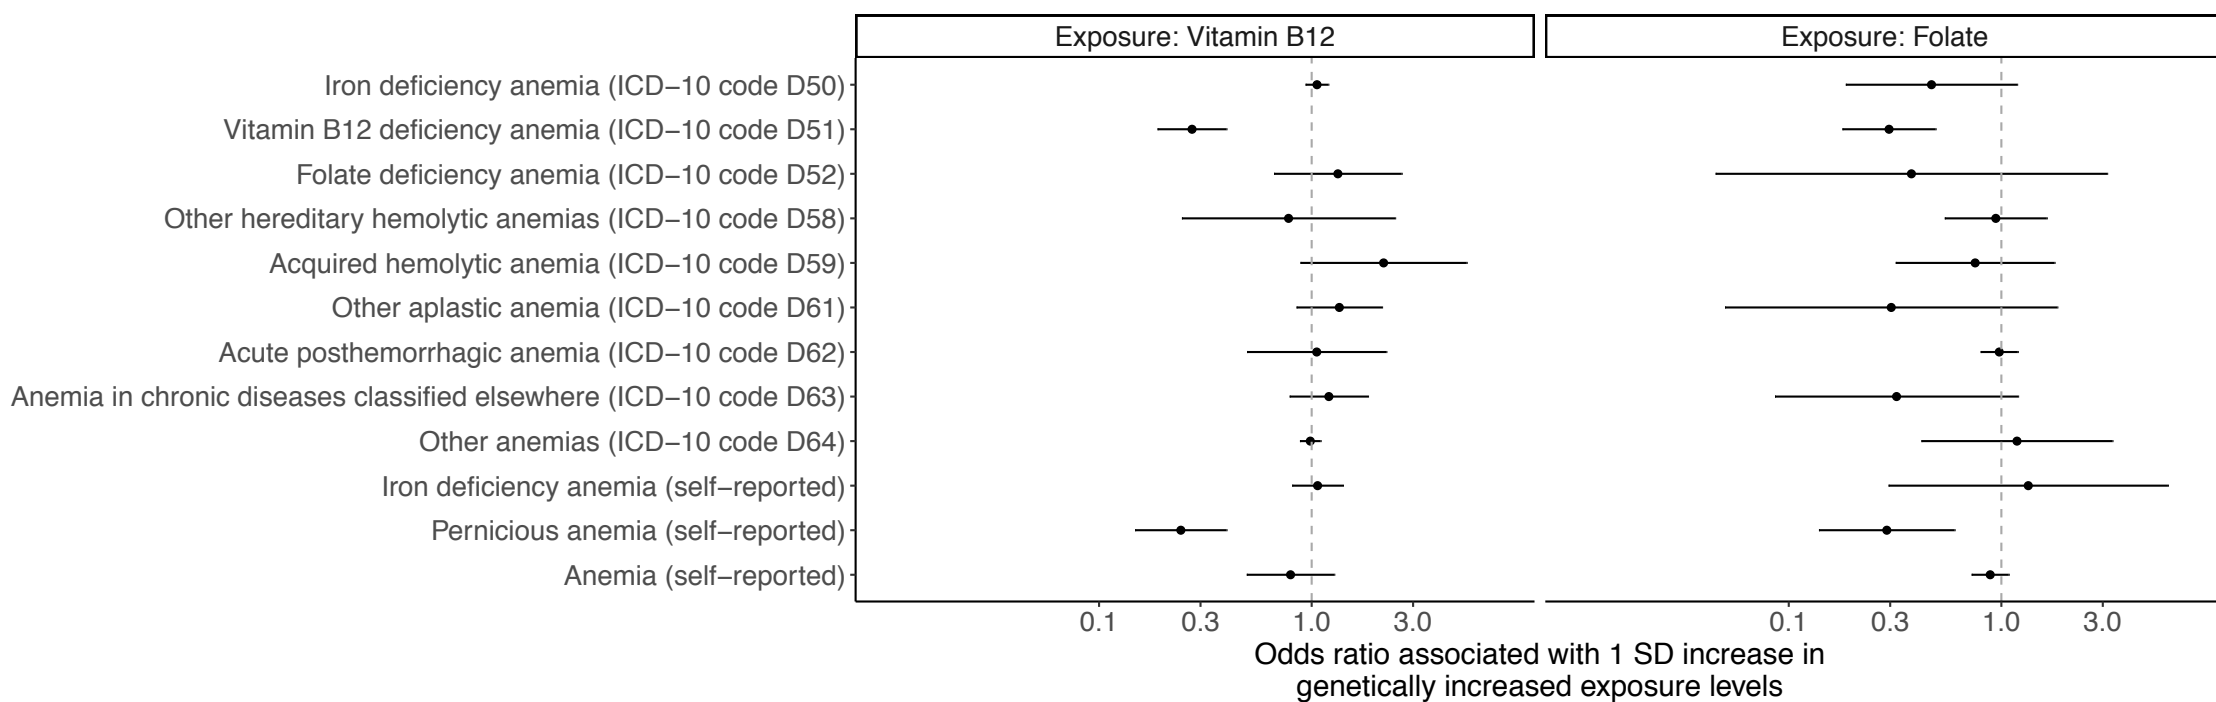

Figure 2. Associations between genetically predicted vitamin B12 and folate levels and various types of anemia. Mendelian randomization estimates obtained using the weighted median method and the Wald ratio method are illustrated for vitamin B12 levels and folate levels, respectively.

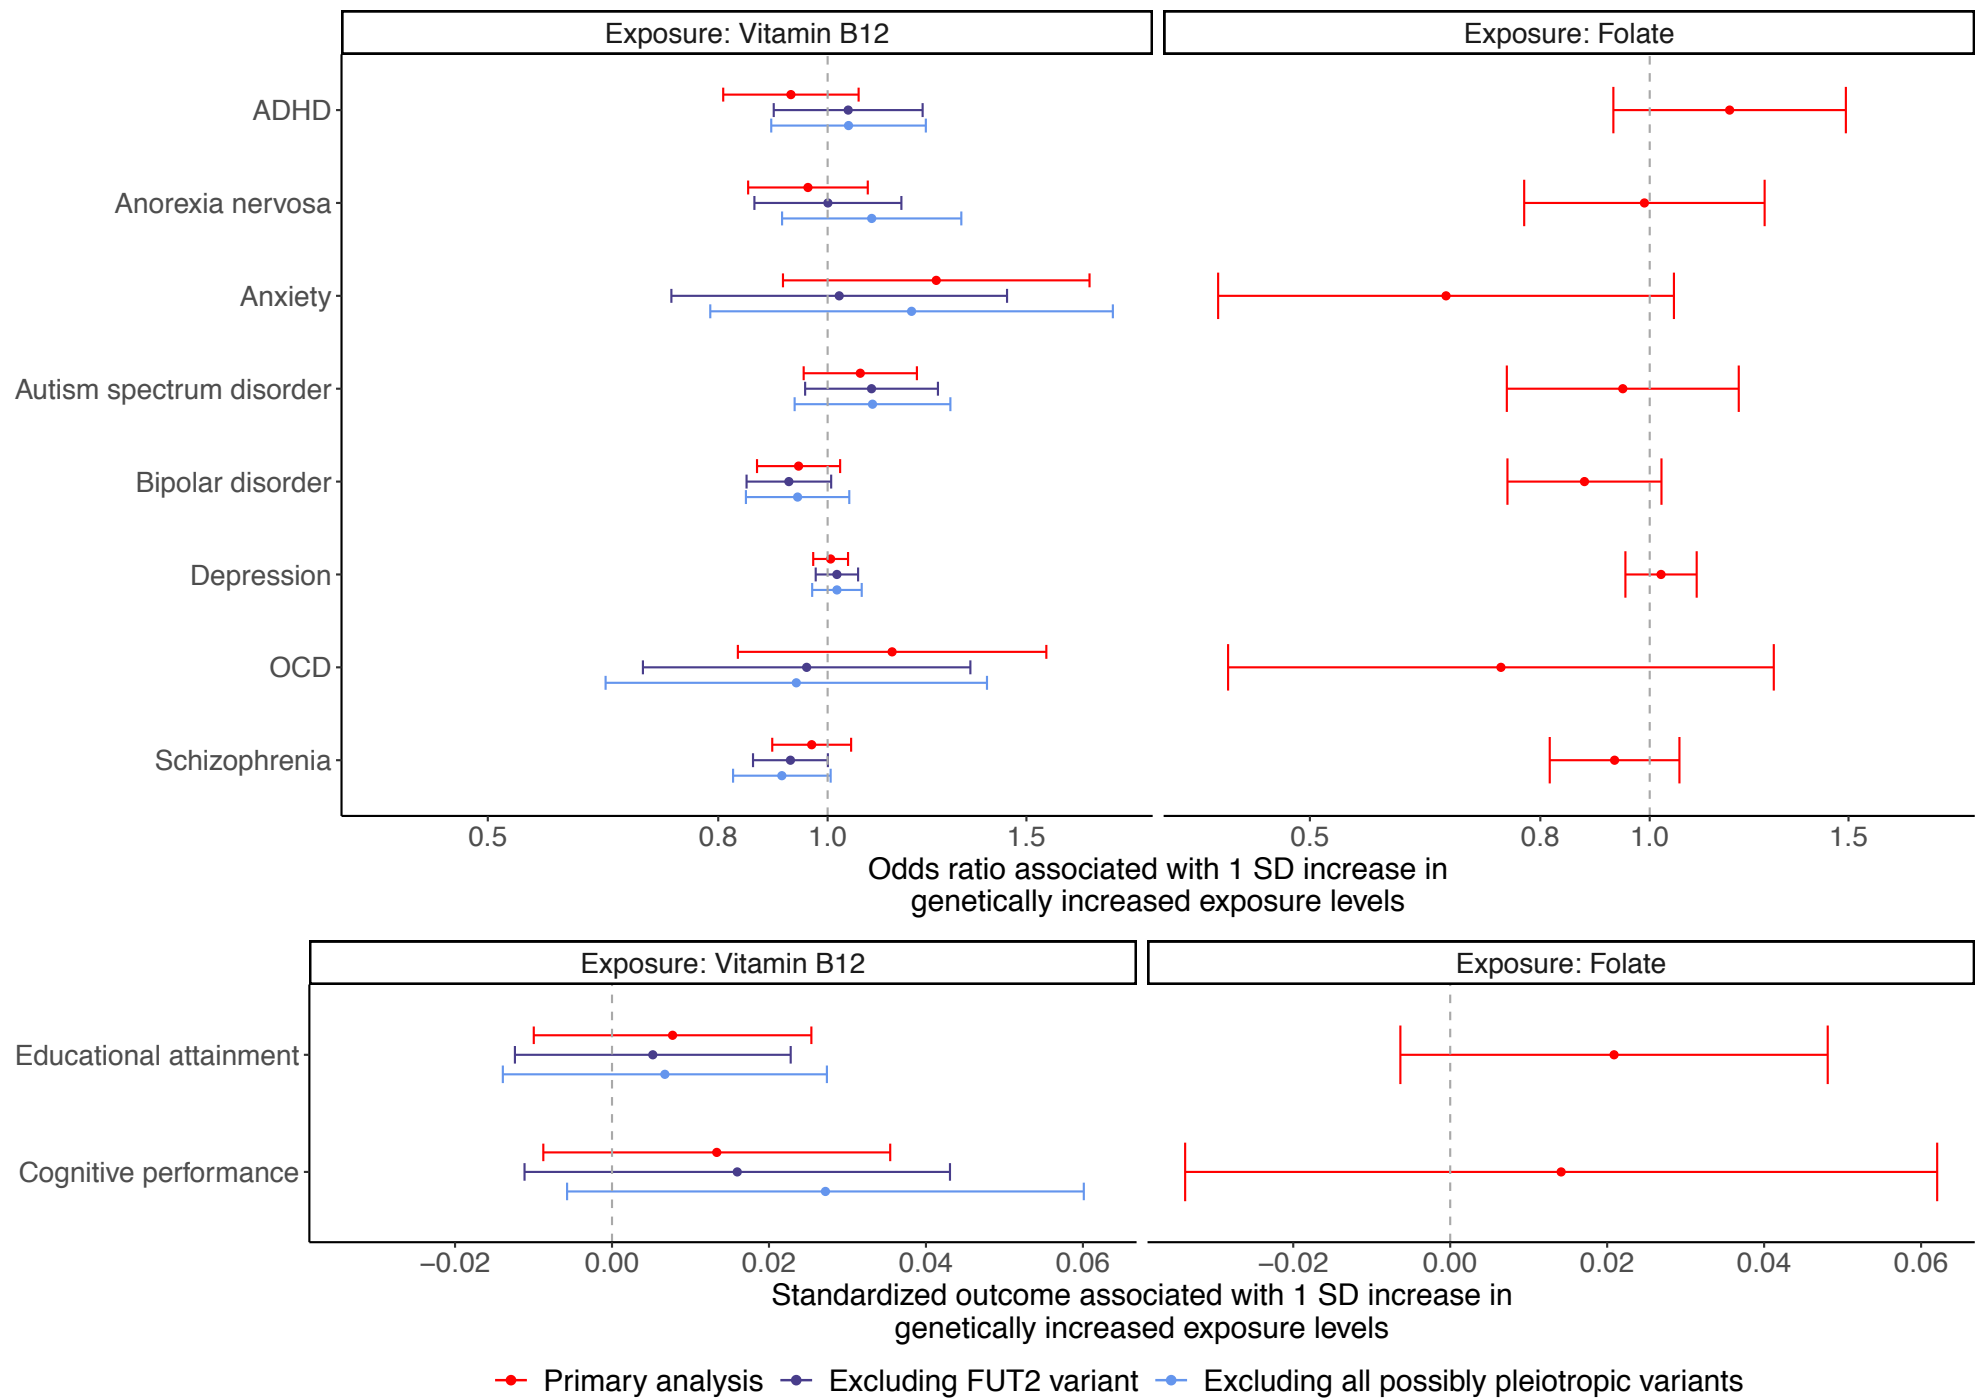

Figure 3. Associations between genetically predicted vitamin B12 and folate levels and eight psychiatric disorders, educational attainment, and cognitive performance. Sensitivity analyses for vitamin B12 levels were performed after excluding genetic instruments that were potentially subject to horizontal pleiotropy. Mendelian randomization estimates obtained using the weighted median method and the inverse variance weighted regression method are illustrated for vitamin B12 levels and folate levels, respectively.

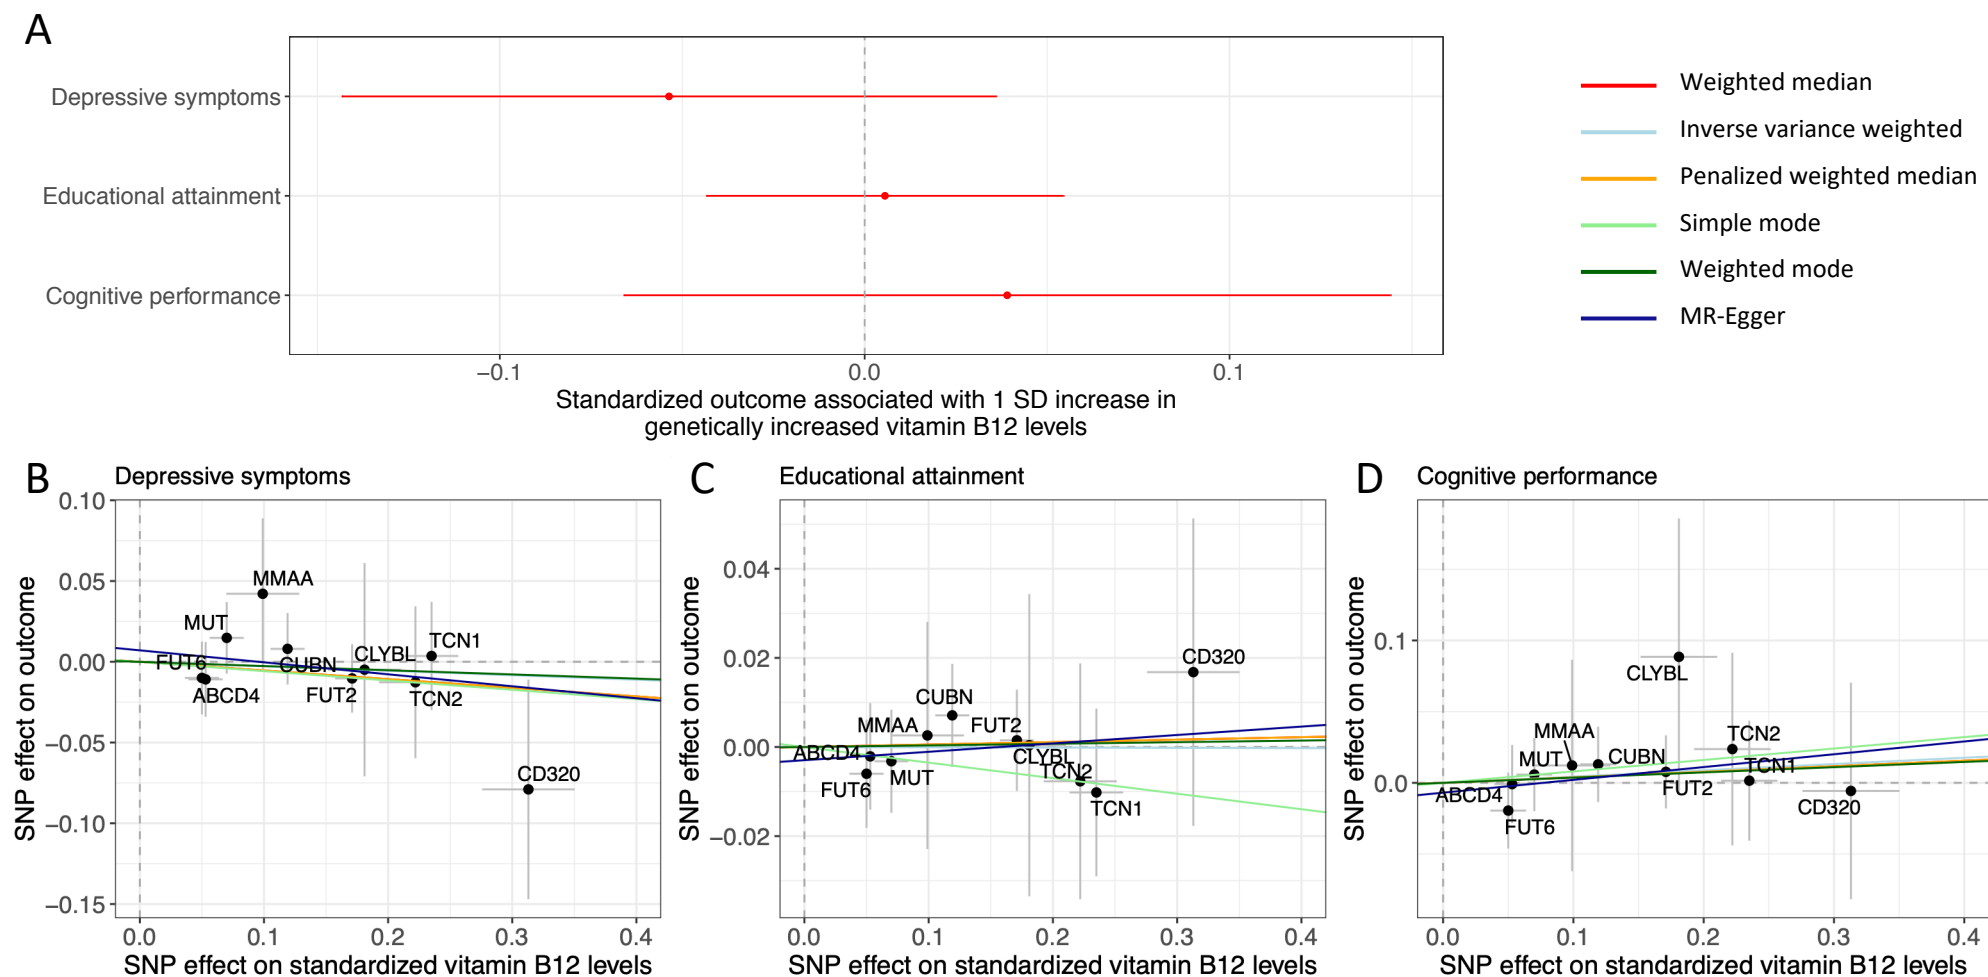

Figure 4. Estimated effects of vitamin B12 levels based on within-sibship studies. (A) Associations between genetically predicted vitamin B12 and depressive symptoms, educational attainment, and cognitive performance. Mendelian randomization estimates obtained using the weighted median method are illustrated. Scatter plots comparing the genetic instrument-outcome and the genetic instrument-vitamin B12 levels associations are illustrated for (B) depressive symptoms, (C) educational attainment, and (D) cognitive performance. The mapped genes of the respective genetic instruments are indicated. The slopes of the colored lines represent estimates obtained through different Mendelian randomization methods.

medRxiv preprint doi: <https://doi.org/10.1101/2024.01.23.24301678>; this version posted January 24, 2024. The copyright holder for this preprint (which was not certified by peer review) is the author/funder, who has granted medRxiv a license to display the preprint in perpetuity. It is made available under a [CC-BY 4.0 International license](https://creativecommons.org/licenses/by/4.0/).

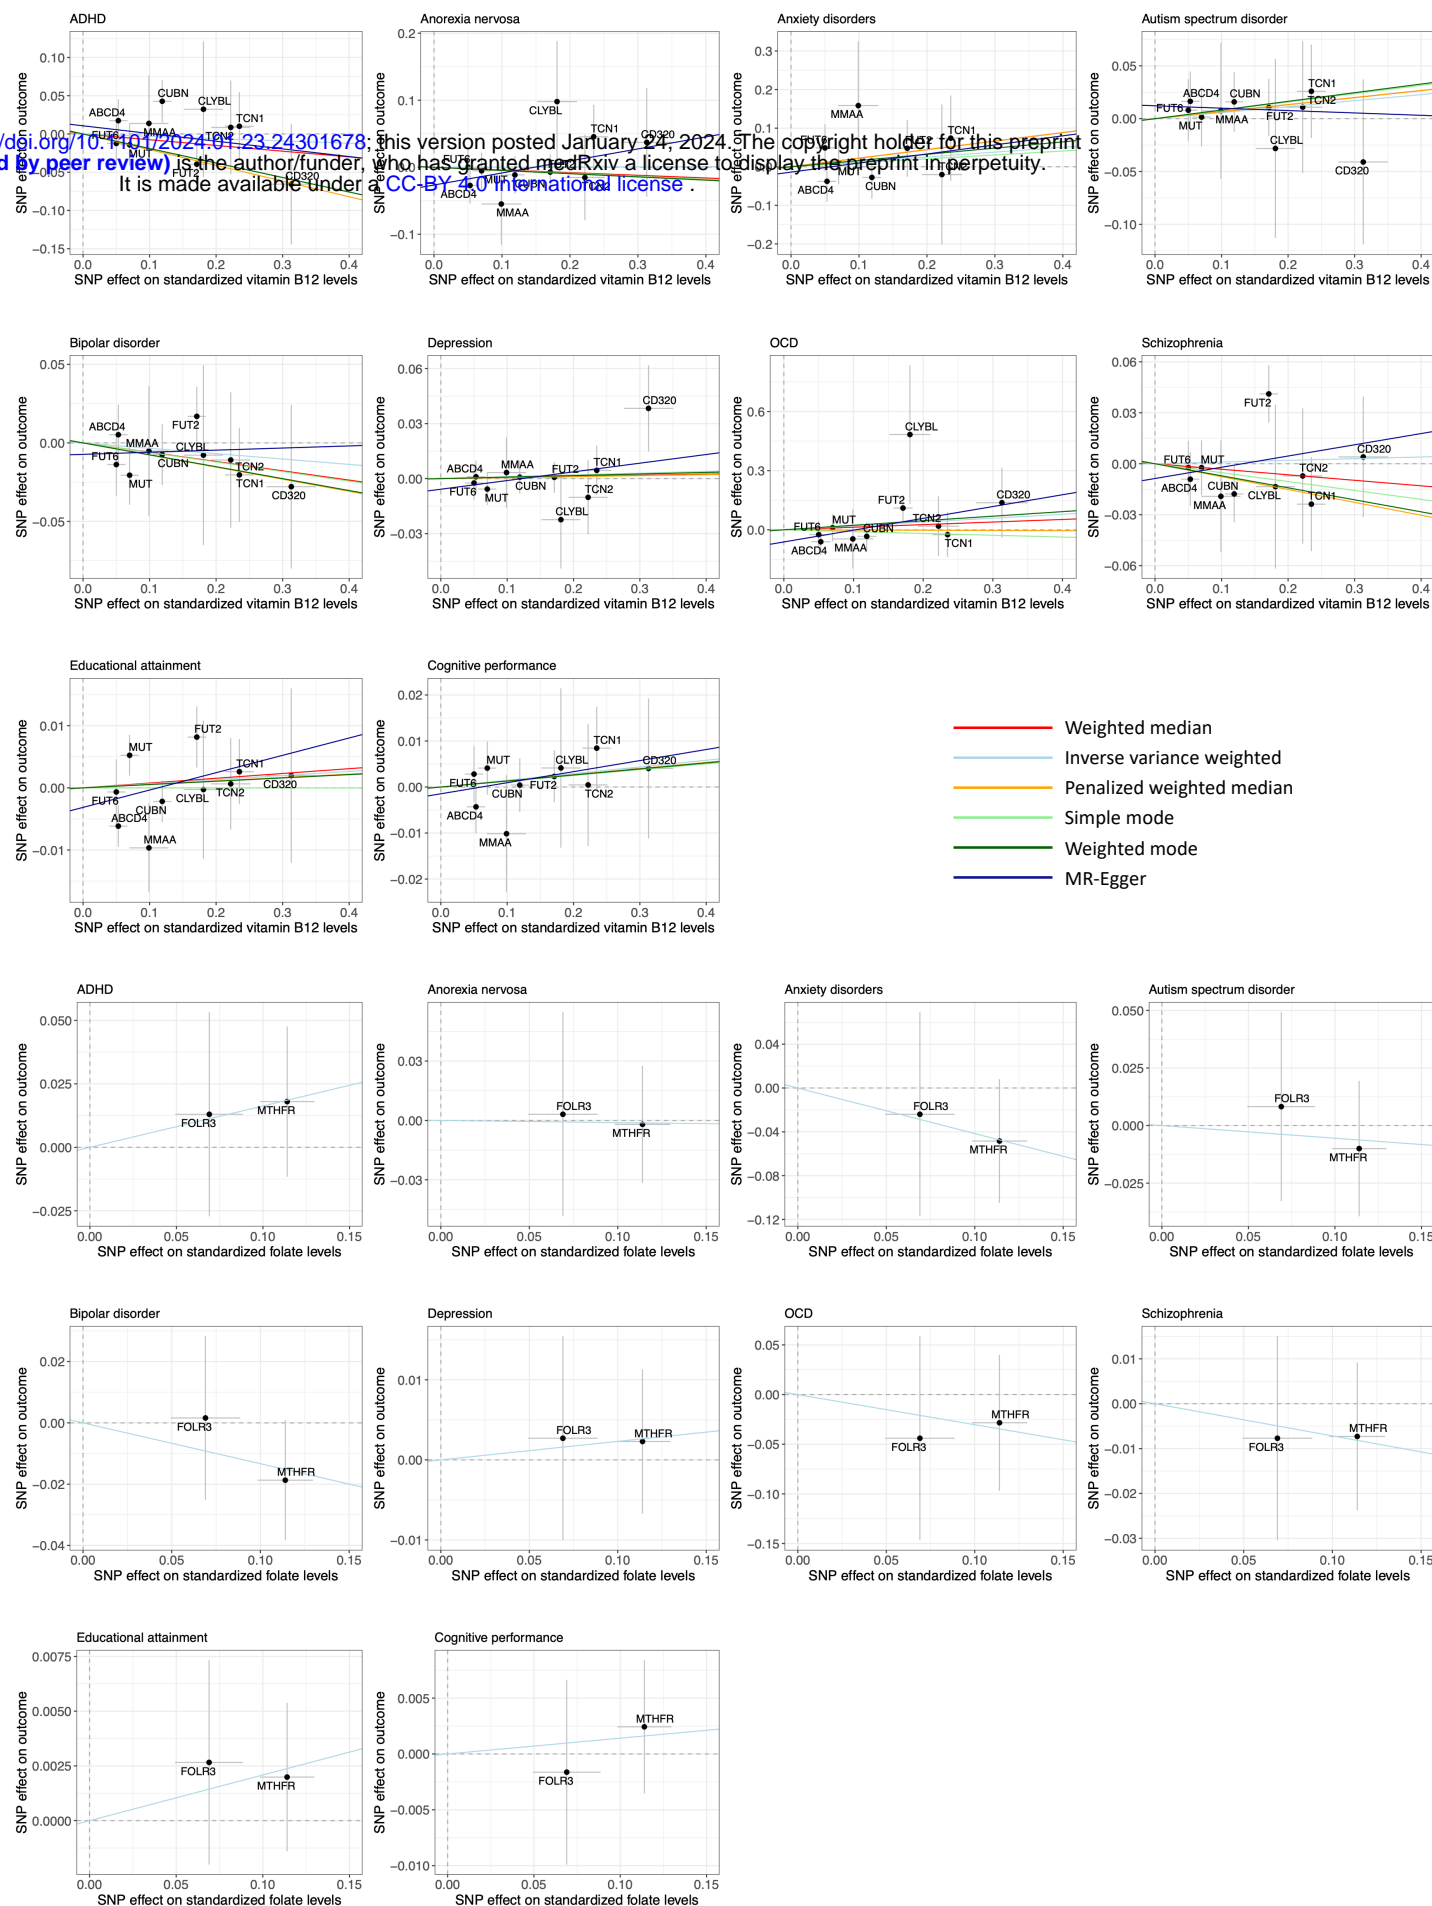

Figure S1. Scatter plots comparing the genetic instrument-outcome and the genetic instrument-exposure associations. Primary results were obtained using the weighted median method and the inverse variance weighted regression method for vitamin B12 levels and folate levels, respectively. The mapped genes of the respective genetic instruments are indicated. The slopes of the colored lines represent estimates obtained through different Mendelian randomization methods.
